# Supplementary material
Source: publisher figshare collection journal article supplement (https://tandf.figshare.com/ndownloader/files/17761313)
Supplement: Supplementary file 1 [file 17761313]

**Supplementary Content**

**Liquid Crystal Dimers Containing Cholesteryl and Triazole-Containing Mesogenic Units**

Arwa Alshargabi,a Guan-Yeow Yeap,a† Wan Ahmad Kamil Mahmood,a Chun-Chieh Han,b

Hong-Cheu Linb and Masato M Itoc

- Physical properties, elemental analysis and spectroscopic results for intermediates and final compounds.
- 1H-NMR and 13C-NMR spectra for the derivative **6c**.

**2a:**

Color: white. Yield: 70%. IR (KBr) ν/cm-1, 2975, 2867 (C-Halkyl), 1733 (C=O ester), 1465 (C=C), 1171 (C-O). 1H-NMR (500 MHz, CDCl3) δ/ppm, 5.37 (1H, d, *J* = 4.3 Hz, HC=C chol.), 4.65-4.58 (1H, m), 3.41 (2H, t, *J* = 6.7 Hz, CH2Br), 2.31-2.28 (4H, m, CH2), 2.19-0.67 (47H, 13 x CH2, 6 x CH, 5 x CH3). Elemental analysis Cal. for C33H55BrO2 (563.69): C 70.31; H 9.83 %. Found C 70.80; H 10.01 %.

**2b:**

Color: white. Yield: 75%. IR (KBr) ν/cm-1, 2970, 2866 (C-Halkyl), 1732 (C=O ester), 1464 (C=C), 1171 (C-O). 1H-NMR (500 MHz, CDCl3) δ/ppm, 5.37 (1H, d, *J* = 4.4 Hz, HC=C chol.), 4.64-4.58 (1H, m), 3.41 (2H, t, *J* = 6.7 Hz, CH2Br), 2.31-2.27 (4H, m, CH2), 2.19-0.67 (49H, 14 x CH2, 6 x CH, 5 x CH3). Elemental analysis Cal. for C34H57BrO2 (577.27): C 70.69; H 9.94%. Found C 70.69; H 9.94%.

**2c:**

Color: white. Yield: 73%. IR (KBr) ν/cm-1, 2966, 2866 (C-Halkyl), 1733 (C=O ester), 1465 (C=C), 1173 (C-O). 1H-NMR (500 MHz, CDCl3) δ/ppm, 5.37 (1H, d, *J* = 4.4 Hz, HC=C chol.), 4.64-4.58 (1H, m), 3.41 (2H, t, *J* = 6.7 Hz, CH2Br), 2.31-2.26 (4H, m, CH2), 2.21-0.67 (51H, 15 x CH2, 6 x CH, 5 x CH3). Elemental analysis Cal. for C35H59BrO2 (591.75): C 71.04; H 10.05%. Found C 71.04; H 10.05%.

**2d:**

Color: white. Yield: 80%. IR (KBr) ν/cm-1, 2979, 2854 (C-Halkyl), 1735 (C=O ester), 1466 (C=C), 1171 (C-O). 1H-NMR (500 MHz, CDCl3) δ/ppm, 5.37 (1H, d, *J* = 4.4 Hz, HC=C chol.), 4.64-4.58 (1H, m), 3.40 (2H, t, *J* = 6.7 Hz, CH2Br), 2.31-2.26 (4H, m, CH2), 2.19-0.67 (53H, 16 x CH2, 6 x CH, 5 x CH3). Elemental analysis Cal. for C36H61BrO2 (605.77): C 71.38; H 10.15%. Found C 71.38; H 10.15%.

**2e:**

Color, white. Yield, 78%. IR (KBr) ν/cm-1, 2975, 2866 (C-Halkyl), 1732 (C=O ester), 1467 (C=C), 1171 (C-O). 1H-NMR (500 MHz, CDCl3) δ/ppm, 5.37 (1H, d, *J* = 4.3 Hz, HC=C chol.), 4.64-4.58 (1H, m), 3.40 (2H, t, *J* = 6.7 Hz, CH2Br), 2.31-2.26 (4H, m, CH2), 2.15- 0.67 (55H, 17 x CH2, 6 x CH, 5 x CH3). Elemental analysis Cal. for C37H63BrO2 (618.80): C 71.70; H 10.25%. Found C 71.70; H 10.25%.

**2f:**

Color, white. Yield, 77%. IR (KBr) ν/cm-1, 2970, 2853 (C-Halkyl), 1735 (C=O ester), 1466 (C=C), 1170 (C-O). 1H-NMR (500 MHz, CDCl3) δ/ppm, 5.37 (1H, d, *J* = 4.5 Hz, HC=C chol.), 4.67-4.61 (1H, m), 3.41 (2H, t, *J* = 6.9 Hz, CH2Br), 2.35-2.26 (4H, m, CH2), 2.05- 0.67 (55H, 18 x CH2, 6 x CH, 5 x CH3). Elemental analysis Cal. for C38H65BrO2 (633.83): C 72.01; H 10.34%. Found C 72.01; H 10.34%.

**3a:**

Color, white. Yield, 68%. M.P, 97.3- 97.4 °C. IR (KBr) ν/cm-1, 2962, 2867 (C-Halkyl), 2096 (C-N3), 1734 (C=O ester), 1465 (C=C), 1173 (C-O). 1H-NMR (500 MHz, CDCl3) δ/ppm, 5.37 (1H, d, *J* = 4.4 Hz, HC=C chol.), 4.65-4.58 (1H, m), 3.27 (2H, t, *J* = 6.8 Hz, CH2N3), 2.31-2.28 (4H, m, CH2), 2.19-0.67 (47H, 13 x CH2, 6 x CH, 5 x CH3). Elemental analysis Cal. for C33H55N3O2 (525.81): C 75.38; H 10.54; N 7.99%. Found C 75.29; H 10.65; N 7.85%.

**3b:**

Color, white. Yield, 70%. M.P, 82.8-83.0 °C. IR (KBr) ν/cm-1, 2941, 2868 (C-Halkyl), 2094 (C-N3), 1734 (C=O ester), 1465 (C=C), 1172 (C-O). 1H-NMR (500 MHz, CDCl3) δ/ppm, 5.37 (1H, d, *J* = 4.4 Hz, HC=C chol.), 4.64-4.58 (1H, m), 3.26 (2H, t, *J* = 6.9 Hz, CH2N3), 2.31-2.26 (4H, m, CH2), 2.19-0.67 (49H, 14 x CH2, 6 x CH, 5 x CH3). Elemental analysis Cal. for C34H57N3O2 (539.84): C 75.65; H 10.64; N 7.78%. Found C 75.65; H 10.64; N 7.78%.

**3c:**

Color, white. Yield, 73%. M.P, 70.0-70.2 °C. IR (KBr) ν/cm-1, 2937, 2868 (C-Halkyl), 2094 (C-N3), 1736 (C=O ester), 1466 (C=C), 1171 (C-O). 1H-NMR (500 MHz, CDCl3) δ/ppm, 5.37 (1H, d, *J* = 4.5 Hz, HC=C chol.), 4.64-4.58 (1H, m), 3.25 (2H, t, *J* = 6.9 Hz, CH2N3), 2.31-2.27 (4H, m, CH2), 2.19-0.67 (51H, 15 x CH2, 6 x CH, 5 x CH3). Elemental analysis Cal. for C35H59N3O2 (553.86): C 75.90; H 10.74; N 7.57%. Found C 75.90; H 10.74; N 7.57%.

**3d:**

Color, white. Yield, 71%. M.P, 78.0-78.3 °C. IR (KBr) ν/cm-1, 2962, 2855 (C-Halkyl), 2093 (C-N3), 1736 (C=O ester), 1466 (C=C), 1170 (C-O). 1H-NMR (500 MHz, CDCl3) δ/ppm, 5.37 (1H, d, *J* = 4.6 Hz, HC=C chol.), 4.64-4.57 (1H, m), 3.25 (2H, t, *J* = 6.9 Hz, CH2N3), 2.31-2.25 (4H, m, CH2), 2.19-0.67 (51H, 16 x CH2, 6 x CH, 5 x CH3). Elemental analysis Cal. for C36H61N3O2 (567.89): C 76.14; H 10.83; N 7.40%. Found C 76.14; H 10.83; N 7.40%.

**3e:**

Color, white. Yield, 78%. M.P, 82.2-82.5 °C. IR (KBr) ν/cm-1, 2958, 2855 (C-Halkyl), 2094 (C-N3), 1735 (C=O ester), 1467 (C=C), 1168 (C-O). 1H-NMR (500 MHz, CDCl3) δ/ppm, 5.37 (1H, d, *J* = 4.5 Hz, HC=C chol.), 4.64-4.58 (1H, m), 3.26 (2H, t, *J* = 7 Hz, CH2N3), 2.31-2.25 (4H, m, CH2), 2.19-0.67 (55H, 17 x CH2, 6 x CH, 5 x CH3). Elemental analysis Cal. for C37H63N3O2 (581.92): C 76.37; H 10.91; N 7.22%. Found C 76.37; H 10.91; N 7.22%.

**3f:**

Color, white. Yield, 80%. IR (KBr) ν/cm-1, 2933, 2852 (C-Halkyl), 2096 (C-N3), 1732 (C=O ester), 1467 (C=C), 1172 (C-O). 1H-NMR (500 MHz, CDCl3) δ/ppm, 5.37 (1H, d, *J* = 4.5 Hz, HC=C chol.), 4.64-4.58 (1H, m), 3.26 (2H, t, *J* = 7 Hz, CH2N3), 2.30-2.27 (4H, m, CH2), 2.19-0.67 (57H, 18 x CH2, 6 x CH, 5 x CH3). Elemental analysis Cal. for C38H65N3O2 (595.94): C 76.59; H 10.99; N 7.05%. Found C 76.59; H 10.99; N 7.05%.

**6a**:Color: white. Yield: 80%. IR (KBr) ν/cm-1, 2941-2858 (C-Halkyl), 1730-1711 (C=O ester), 1605 (C=C aromatic), 1466 (C=C chol.), 1250-1169 (C-O). 1H-NMR (500 MHz, CDCl3) δ/ppm, 7.99 (2H, d, *J* = 8.6 Hz, ArH), 7.62 (1H, s, CH triazole), 7.00 (2H, d, *J* = 8.7 Hz, ArH), 5.41, 5.36 (2H, d, *J* = 3.6 Hz, *J* = 3.5 Hz, C=CH chol.), 5.25 (2H, s, OCH2), 4.85-4.79, 4.63-4.56 (2H, m, CH chol.), 4.37 (2H, t, *J* = 7.1 Hz, CH2N), 2.44 (2H, d, *J* = 7.8 Hz, CH2), 2.29-2.26 (4H, m, CH2), 2.03-0.67 (88H, 23 x CH2, 12 x CH, 10 x CH3 ). 13C-NMR (125 MHz, CDCl3) δ/ppm, 172.71, 165.62, 161.79, 161.04, 144.35, 139.75, 139.61, 131.58, 131.50, 124.20, 123.88, 122.70, 122.68, 114.32, 74.33, 73.98, 62.21, 56.72, 56.69, 56.18, 50.24, 50.09, 42.34, 39.74, 39.53, 38.29, 37.07, 36.60, 36.20, 35.80, 34.22, 31.95, 31.87, 30.89, 28.23, 28.01, 27.95, 24.29, 24.25, 23.84, 22.80, 22.56, 21.07, 19.37, 19.30 18.72, 11.85. Elemental analysis Cal. for C70H107N3O5 (1070.62): C 78.53; H 10.07; N 3.92. Found C 78.36; H 10.06; N 3.75.

**6b**:

Color: white. Yield: 83%. IR (KBr) ν/cm-1, 2941-2867 (C-Halkyl), 1730-1711 (C=O ester), 1606 (C=C aromatic), 1466 (C=C chol.), 1249-1168 (C-O). 1H-NMR (500 MHz, CDCl3) δ/ppm, 7.98 (2H, d, *J* =8.6 Hz, ArH), 7.63 (1H, s, CH triazole), 7.00 (2H, d, *J* = 8.7 Hz, ArH), 5.41, 5.36 (2H, d, *J* = 3.7 Hz, *J* = 3.9 Hz, C=CH chol.), 5.26 (2H, s, OCH2), 4.85-4.79, 4.63-4.57 (2H, m, CH chol.), 4.36 (2H, t, *J* = 7.1 Hz, CH2N), 2.44 (2H, d, *J* = 7.8 Hz, CH2), 2.30-2.24 (4H, m, CH2), 2.03-0.67 (90H, 24 x CH2, 12 x CH, 10 x CH3). 13C-NMR (125 MHz, CDCl3) δ/ppm, 172.92, 165.63, 161.77, 139.76, 139.66, 131.59, 123.91, 122.69, 121.66, 114.32, 74.33, 73.78, 62.14, 56.73, 56.71, 56.18, 50.46, 50.09, 42.35, 39.78, 39.53, 38.30, 37.08, 36.68, 36.21, 35.80, 34.39, 31.95, 31.91, 28.23, 28.01, 27.95, 24.29, 23.85, 22.80, 22.56, 21.07, 19.38, 19.31, 18.72, 11.86. Elemental analysis Cal. for C71H109N3O5 (1084.64): C 78.62; H 10.13; N 3.87. Found C 78.63; H 10.25; N 3.84%.

**6c**:

Color: white. Yield: 85%. IR (KBr) ν/cm-1, 2946-2854 (C-Halkyl), 1730-1712 (C=O ester), 1606 (C=C aromatic), 1466 (C=C chol.), 1250-1169 (C-O). 1H-NMR (500 MHz, CDCl3) δ/ppm, 7.99 (2H, d, *J* =8.9 Hz, ArH), 7.59 (1H, s, CH triazole), 7.00 (2H, d, *J* = 8.9 Hz, ArH), 5.41, 5.36 (2H, d, *J* = 3.6 Hz, *J* = 3.8 Hz, C=CH chol.), 5.26 (2H, s, OCH2), 4.85-4.79, 4.63-4.57 (2H, m, CH chol. ), 4.36 (2H, t, *J* = 7.2 Hz, CH2N), 2.44 (2H, d, *J* = 7.7 Hz, CH2), 2.30-2.24 (4H, m, CH2), 2.03-0.67 (92H, 25 x CH2, 12 x CH, 10 x CH3). 13C-NMR (125 MHz, CDCl3) δ/ppm, 173.08, 165.63, 161.79, 143.56, 139.75, 139.68, 131.59, 123.87, 122.70, 122.64, 122.51, 114.32, 74.32, 73.80, 62.19, 56.70, 56.17, 50.44, 50.08, 42.33, 39.77, 39.75, 39.53, 38.30, 38.18, 37.07, 36.67, 36.20, 34.52, 31.95, 31.91, 28.24, 28.02, 27.95, 24.30, 23.85, 22.28, 22.57, 21.07, 19.38, 19.32, 18.73, 11.86. Elemental analysis Cal. for C72H111N3O5 (1098.7): C 78.71; H 10.18; N 3.82%. Found C 78.57; H 10.16; N 3.83.

**6d**:

Color: white. Yield: 88%. IR (KBr) ν/cm-1, 2946-2858 (C-Halkyl), 1730-1711 (C=O ester), 1606 (C=C aromatic), 1467 (C=C chol.), 1250-1169 (C-O). 1H-NMR (500 MHz, CDCl3) δ/ppm, 8.00 (2H, d, *J* = 7 Hz, ArH), 7.63 (1H, s, CH triazole), 7.00 (2H, d, *J* = 7 Hz, ArH), 5.42, 5.37 (2H, d, *J* = 3.7 Hz, *J* = 4.0 Hz, C=CH chol.), 5.52 (2H, s, OCH2), 4.85-4.79, 4.62-4.57 (2H, m, CH chol.), 4.38 (2H, t, *J* = 7 Hz, CH2N), 2.44 (2H, d, *J* = 7.8 Hz, CH2), 2.31-2.23 (4H, m, CH2), 2.03-0.67 (94H, 26 x CH2, 12 x CH, 10 x CH3). 13C-NMR (125 MHz, CDCl3) δ/ppm, 173.17, 165.64, 161.78, 144.59, 139.76, 139.71, 131.59, 123.91, 122.70, 121.61, 114.35, 74.33, 73.76, 62.25, 56.71, 56.18, 50.06, 42.34, 39.76, 39.53, 38.30, 37.08, 36.68, 36.21, 35.80, 34.61, 31.91, 31.18, 28.23, 28.01, 27.95, 24.91, 24.29, 23.85, 22.80, 22.56, 21.05, 19.38, 19.32, 18.73, 11.86. Elemental analysis Cal. for C73H113N3O5 (1112.7): C 78.80; H 10.24; N 3.78. Found C 78.60; H 10.19; N 3.73.

**6e**:

Color: white. Yield: 90%. IR (KBr) ν/cm-1, 2946-2867 (C-Halkyl), 1730-1712 (C=O ester), 1606 (C=C aromatic), 1467 (C=C chol.), 1250-1168 (C-O). 1H-NMR (500 MHz, CDCl3) δ/ppm, 7.99 (2H, d, *J* =8.7 Hz, ArH), 7.60 (1H, s, CH triazole), 7.00 (2H, d, *J* = 8.7 Hz, ArH), 5.40, 5.36 (2H, d, *J* = 3.8 Hz, *J* = 4.2 Hz, C=CH chol.), 5.26 (2H, s, OCH2), 4.85-4.79, 4.63-4.57 (2H, m, CH chol.), 4.34 (2H, t, *J* = 7.2 Hz, CH2N), 2.45 (2H, d, *J* = 7.7 Hz, CH2), 2.31-2.24 (4H, m, CH2), 2.03-0.67 (96H, 27 x CH2, 12 x CH, 10 x CH3). 13C-NMR (125 MHz, CDCl3) δ/ppm, 173.20, 165.62, 161.79, 144.47, 139.76, 139.73, 131.58, 123.92, 122.68, 122.59, 114.34, 74.33, 73.73, 62.18, 56.71, 56.19, 50.54, 50.10, 42.35, 39.76, 39.53, 38.30, 37.08, 36.67, 36.21, 35.79, 34.64, 31.95, 31.92, 31.18, 28.22, 28.00, 27.95, 24.28, 23.85, 22.79, 22.54, 21.07, 19.37, 19.31, 18.72. Elemental analysis Cal. for C74H115N3O5 (1126.7): C 78.88; H 10.29; N 3.73. Found C 78.81; H 10.43; N 3.69.

**6f**:

Color: white. Yield: 91%. IR (KBr) ν/cm-1, 2941-2853 (C-Halkyl), 1733-1711 (C=O ester), 1606 (C=C aromatic), 1467 (C=C chol.), 1250-1169 (C-O). 1H-NMR (500 MHz, CDCl3) δ/ppm, 7.99 (2H, d, *J* = 8.4 Hz, ArH), 7.64 (1H, s, CH triazole), 7.00 (2H, d, *J* = 8.5 Hz, ArH), 5.41, 5.36 (2H, d, *J* = 3.8 Hz, *J* = 4.0 Hz, C=CH chol.), 5.52 (2H, s, OCH2), 4.85-4.79, 4.63-4.57 (2H, m, CH chol.), 4.35 (2H, t, *J* = 7 Hz, CH2N), 2.43 (2H, d, *J* = 7.5 Hz, CH2), 2.31-2.24 (4H, m, CH2), 2.03-0.67 (98H, 28 x CH2, 12 x CH, 10 x CH3). 13C-NMR (125 MHz, CDCl3) δ/ppm, 173.26, 165.64, 161.80,144.59, 139.76, 139.74, 131.59, 123.89, 122.70, 122.59, 114.34, 74.33, 73.72, 62.15, 56.71, 56.18, 50.62, 50.09, 42.35, 39.78, 39.53, 38.30, 37.07, 36.68, 36.21, 35.80, 31.95, 31.92, 28.23, 28.01, 27.95, 24.29, 23.85, 22.81, 22.56, 21.07, 19.38, 19.32, 18.72, 11.86. Elemental analysis Cal. for C75H117N3O5 (1140.7): C 78.97; H 10.34; N 3.68. Found C 78.75; H 10.25; N 3.65.

Figure S1. 1H-NMR spectrum and atomic numbering for 4-((1-(7-(cholesteryloxycarbonyl)heptyl)-1H-1,2,3-triazol-4-yl)methoxy)benzoate, 6c.

Figure S2. 13C-NMR spectrum of 4-((1-(7-(cholesteryloxycarbonyl)heptyl)-1H-1,2,3-triazol-4-yl)methoxy)benzoate, 6c.
